# Supplementary material for: Porous silicon carbide derived from apple fruit with high electromagnetic absorption performance
Source: Royal Society of Chemistry journal article supplement (doi:10.1039/c6tc01319h), 2016-01-01
Supplement: c6tc01319h1.pdf [file c6tc01319h1.pdf]

**Supporting Informations:**

# **Porous Silicon Carbide derived from apple fruit with high electromagnetic absorption performance**

Chenyu Liu <sup>a,b</sup>, Dawei Yu <sup>c</sup>, Donald W Kirk <sup>b</sup>, Yongjun Xu <sup>a,\*</sup>

<sup>a</sup> School of Chemical Engineering and Technology, Harbin Institute of Technology, Harbin 150001, China.

<sup>b</sup> Department of Chemical Engineering & Applied Chemistry, University of Toronto, 200 College St., Toronto, Ontario M5S 3E5, Canada

<sup>c</sup> Department of Materials Science and Engineering, University of Toronto, 184 College Street, Suite 140, Toronto, Ontario M5S 3E4 Canada

## **Corresponding Author**

\*Tel: +86-451-86418409. E-mail: [xuyongjun1218@126.com](mailto:xuyongjun1218@126.com)

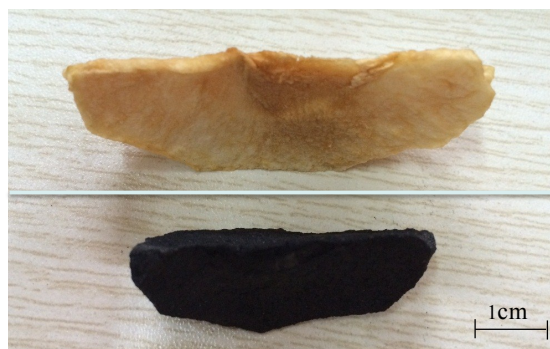

S1. Macroscopic size comparison of dried apple and carbonized apple.
